# Supplementary material for: The Role of ZEB2 in Human CD8 T Lymphocytes: Clinical and Cellular Immune Profiling in Mowat–Wilson Syndrome
Source: MDPI journal article supplement (doi:10.3390/ijms22105324), 2021-05-18
Supplement: s1 [file s1]

Supplementary Table S1: Baseline vaccine responses to Diphtheria, Tetanus and *Haemophilus influenza* type b

|   | Gender | Age (years) | *Anti-Diphtheria (IU/mL) | ~Anti-Tetanus (IU/mL) | ∞Anti-H.influenzae type b (mcg/mL) |
|---|--------|-------------|--------------------------|-----------------------|------------------------------------|
| 1 | M      | 22          | 0.04                     | 0.36                  | 0.16                               |
| 2 | M      | 21          | 0.42                     | 0.18                  | 0.12                               |
| 3 | M      | 20          | 0.26                     | 0.81                  | 0.14                               |
| 4 | F      | 12          | 0.03                     | <0.01                 | 0.25                               |
| 5 | M      | 11          | 0.34                     | 0.14                  | ND                                 |
| 6 | M      | 3           | 0.08                     | 0.25                  | 0.71                               |

\*Diphtheria: 0.01-0.1IU/mL seropositive (but may not be fully protective), >0.1IU/mL protective

~Tetanus: ≥0.16IU/mL protective

∞H. influenza type B: >0.15mcg/mL equates to short term, >1.0 mcg/mL equates to long term protection

Supplementary Table S2: Pneumococcal IgG responses pre- and post-unconjugated pneumococcal vaccine (Pneumovax 23)

|   | Age (y) | Baseline Pneumococcal serotype specific IgG (ug/mL) |     |       |      |     |      |      | Pneumovax 23* given (Yes/No) | ~Pneumococcal serotype specific IgG post polysaccharide vaccination (ug/mL) |       |     |      |     |      |     |
|---|---------|-----------------------------------------------------|-----|-------|------|-----|------|------|------------------------------|-----------------------------------------------------------------------------|-------|-----|------|-----|------|-----|
|   |         | 2                                                   | 8   | 10A   | 11A  | 15  | 17F  | 33F  |                              | 2                                                                           | 8     | 10A | 11A  | 15  | 17F  | 33F |
| 1 | 22      | 1.5                                                 | 0.3 | >10.1 | <0.1 | 0.6 | 0.2  | 0.4  | Y                            | 14.9                                                                        | >14.2 | >13 | 2.8  | 8.8 | 3.6  | 3.1 |
| 2 | 21      | 0.2                                                 | 0.2 | 0.1   | 0.1  | 0.2 | <0.1 | 1.1  | N                            | -                                                                           | -     | -   | -    | -   | -    | -   |
| 3 | 20      | -                                                   | 1.1 | 1.5   | 1.1  | 0.6 | >4.9 | 1.1  | N                            | -                                                                           | -     | -   | -    | -   | -    | -   |
| 4 | 12      | -                                                   | 0.8 | 0.9   | 0.4  | 0.3 | 1.1  | 0.7  | N                            | -                                                                           | -     | -   | -    | -   | -    | -   |
| 5 | 11      | -                                                   | 0.1 | 0.2   | 0.1  | 0.2 | 0.3  | 0.2  | N                            | -                                                                           | -     | -   | -    | -   | -    | -   |
| 6 | 3       | -                                                   | 0.9 | 0.2   | <0.1 | 0.1 | 0.3  | <0.1 | Y                            | >8.6                                                                        | >3.3  | 0.7 | >5.3 | 4.2 | >3.9 | >5  |

\*Pneumovax 23 contains serotypes 4, 6B, 9V, 14, 18C, 19F, 23F, 2, 8, 10A, 11A, 15B, 17F, 20 and 33F.

~pre and post samples required for interpretation; responses considered protective if post vaccination responses >1.0mcg/mL, or >2-fold increase

Supplementary Table S3 – Monoclonal antibodies used in this study

| Antibody        | Fluorochrome   | Company          |
|-----------------|----------------|------------------|
| CD3             | PerCP-Cy5.5    | Becton Dickinson |
| CD4             | AlexaFluor 700 | Becton Dickinson |
| CD4             | PE             | Becton Dickinson |
| CD8             | APC-Cy7        | Becton Dickinson |
| CD8             | BV711          | Becton Dickinson |
| CD16            | BV421          | Becton Dickinson |
| CD19            | BV786          | Becton Dickinson |
| CD25            | BB515          | Becton Dickinson |
| CD25            | APC            | Becton Dickinson |
| CD28            | APC            | Becton Dickinson |
| CD33            | PE-Cy7         | Becton Dickinson |
| CD38            | PE-Cy7         | Becton Dickinson |
| CD45            | AlexaFluor 700 | Becton Dickinson |
| CD45-RA         | BV605          | Biolegend        |
| CD45-RO         | FITC           | Becton Dickinson |
| CD49d           | BV510          | Biolegend        |
| CD56            | APC            | Becton Dickinson |
| CD62L           | APC-eFluor780  | eBioscience      |
| CD127           | PE-CF594       | Becton Dickinson |
| CD127           | BV786          | Becton Dickinson |
| CD134           | PE             | Becton Dickinson |
| CD161           | PE-Cy7         | Biolegend        |
| CCR6            | BV421          | Biolegend        |
| CX3CR1          | FITC           | MBL              |
| Granzyme B      | APC            | Invitrogen       |
| Integrin Beta-7 | APC            | Becton Dickinson |
| PD-1            | BV421          | Becton Dickinson |
| Perforin        | PE             | Biolegend        |

Supplementary Figure S1:

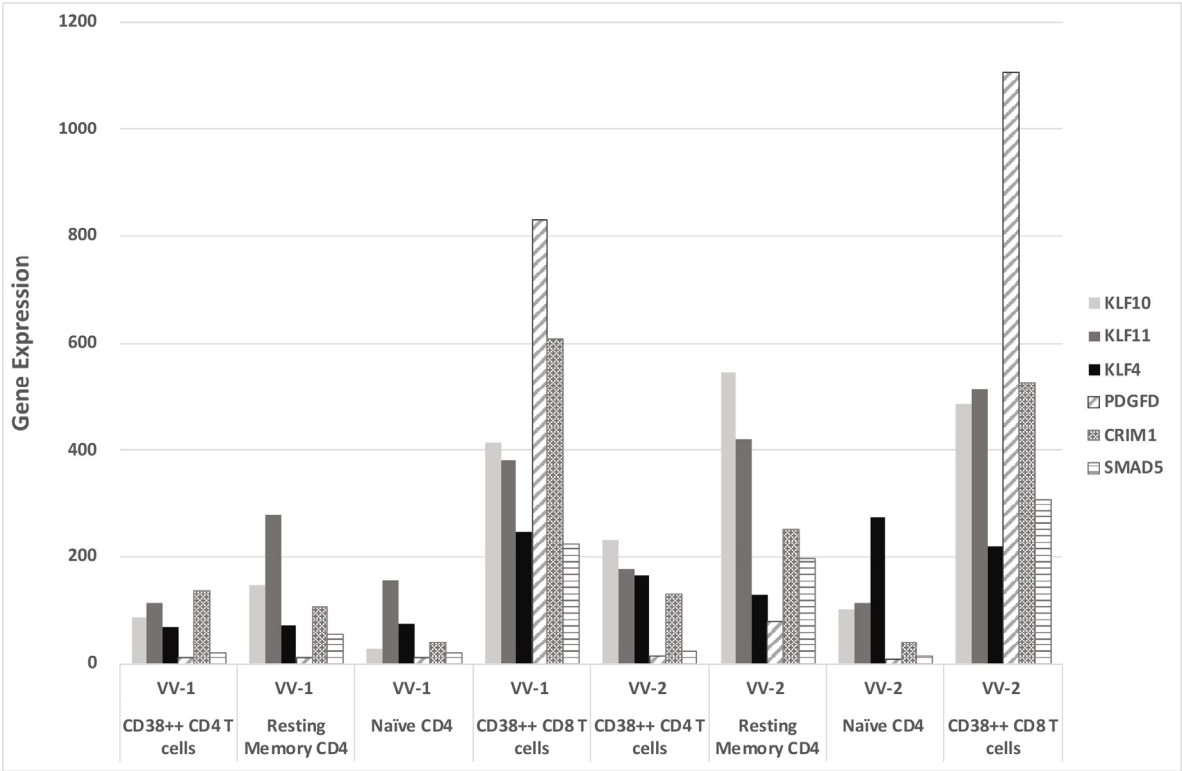

**Supplementary Figure S1.** Gene expression profiling of KLF10, KLF11, KLF4, PDGFD, CRIM1 and SMAD5 RNA, in microarrays of early-activated effector CD38++ CD8 T cells following vaccinia inoculation. Four purified T cells subsets were cell sorted from fresh PBMC: CD38++ CD4 T cells; resting memory CD4 T cells; naïve CD4 T cells; and CD38++ CD8 T cells from each of 2 healthy adult donors, VV1 and VV2. RNA levels for each subset were normalized and calculated in Affymetrix MAS 5.0 software.

Supplementary Figure S2:

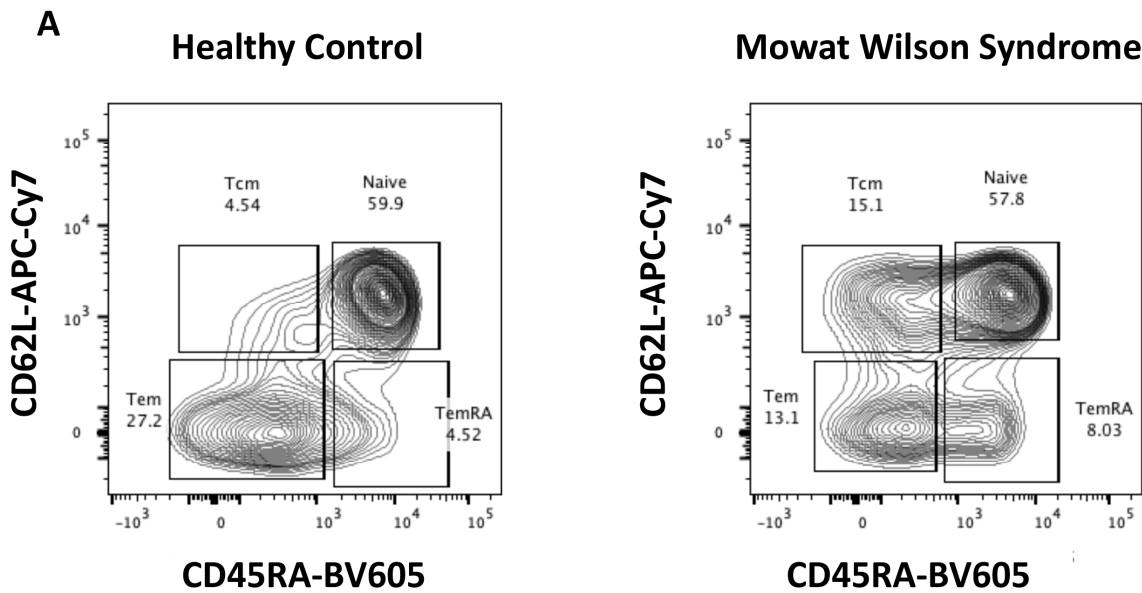

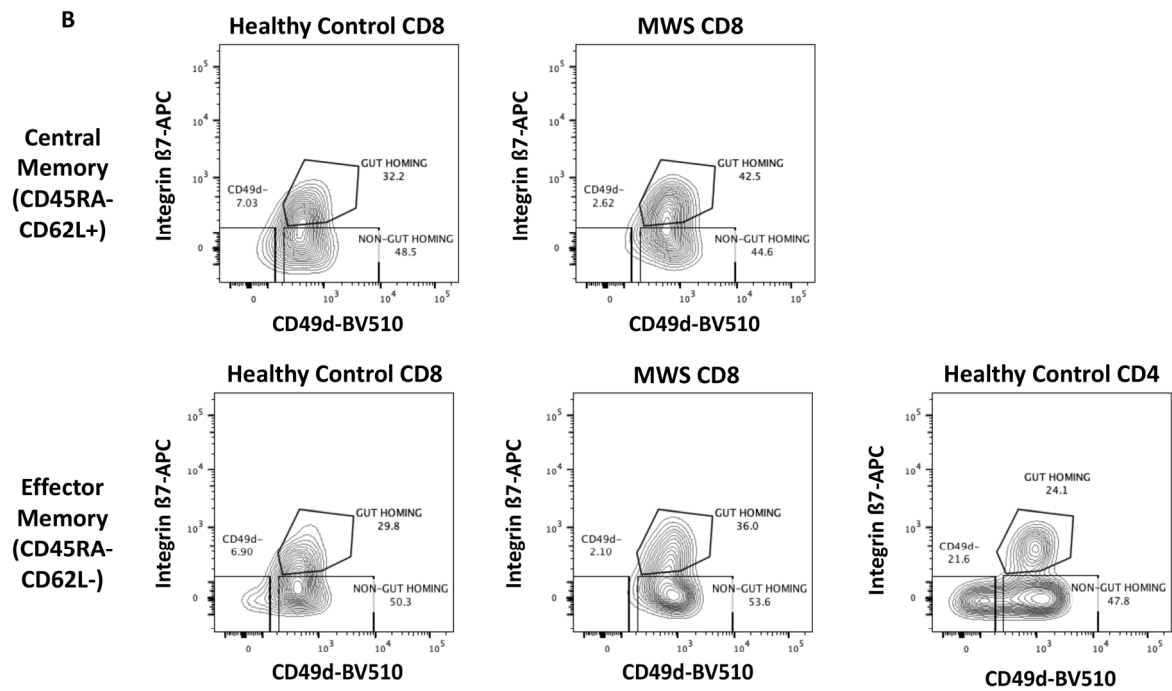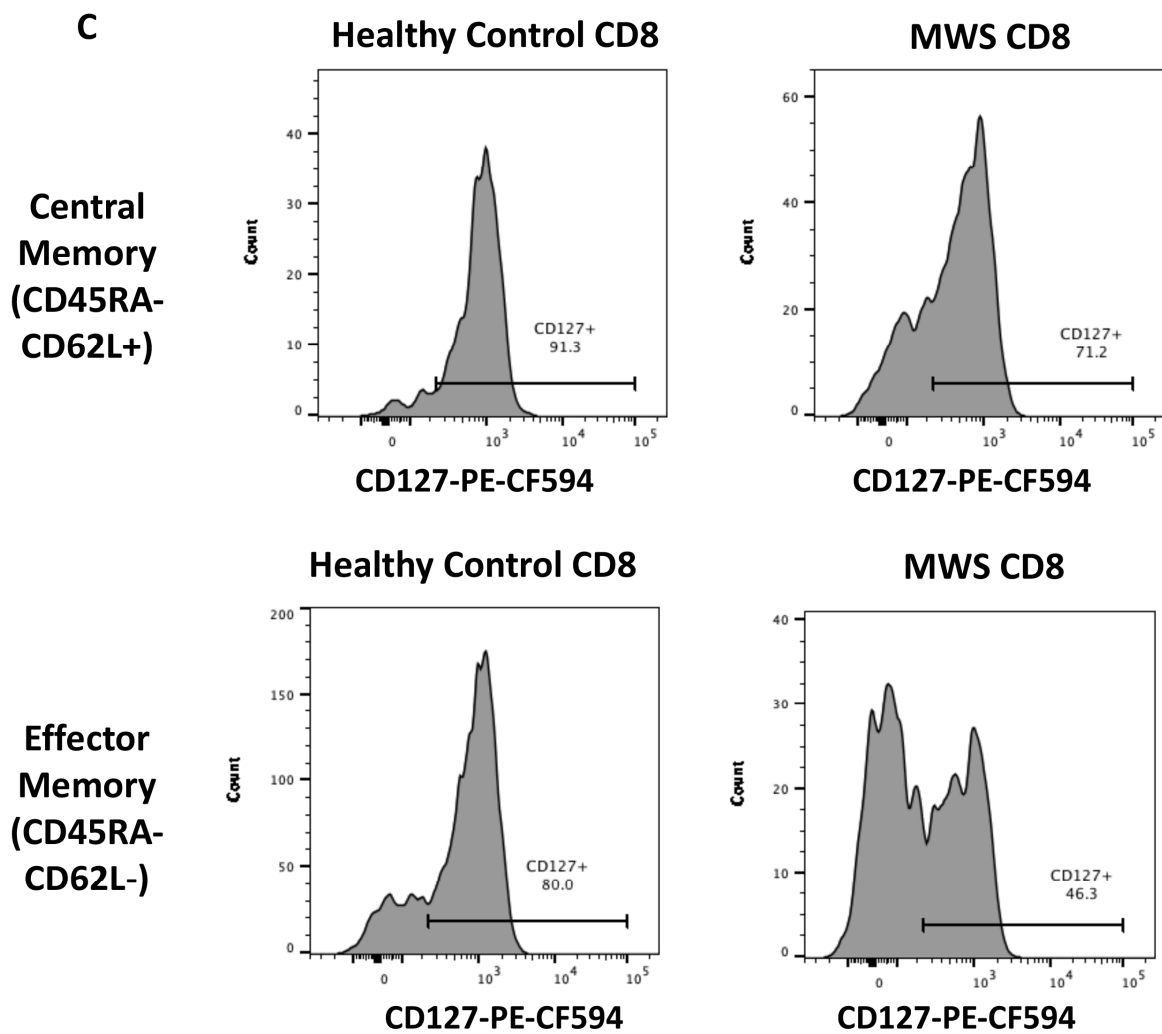

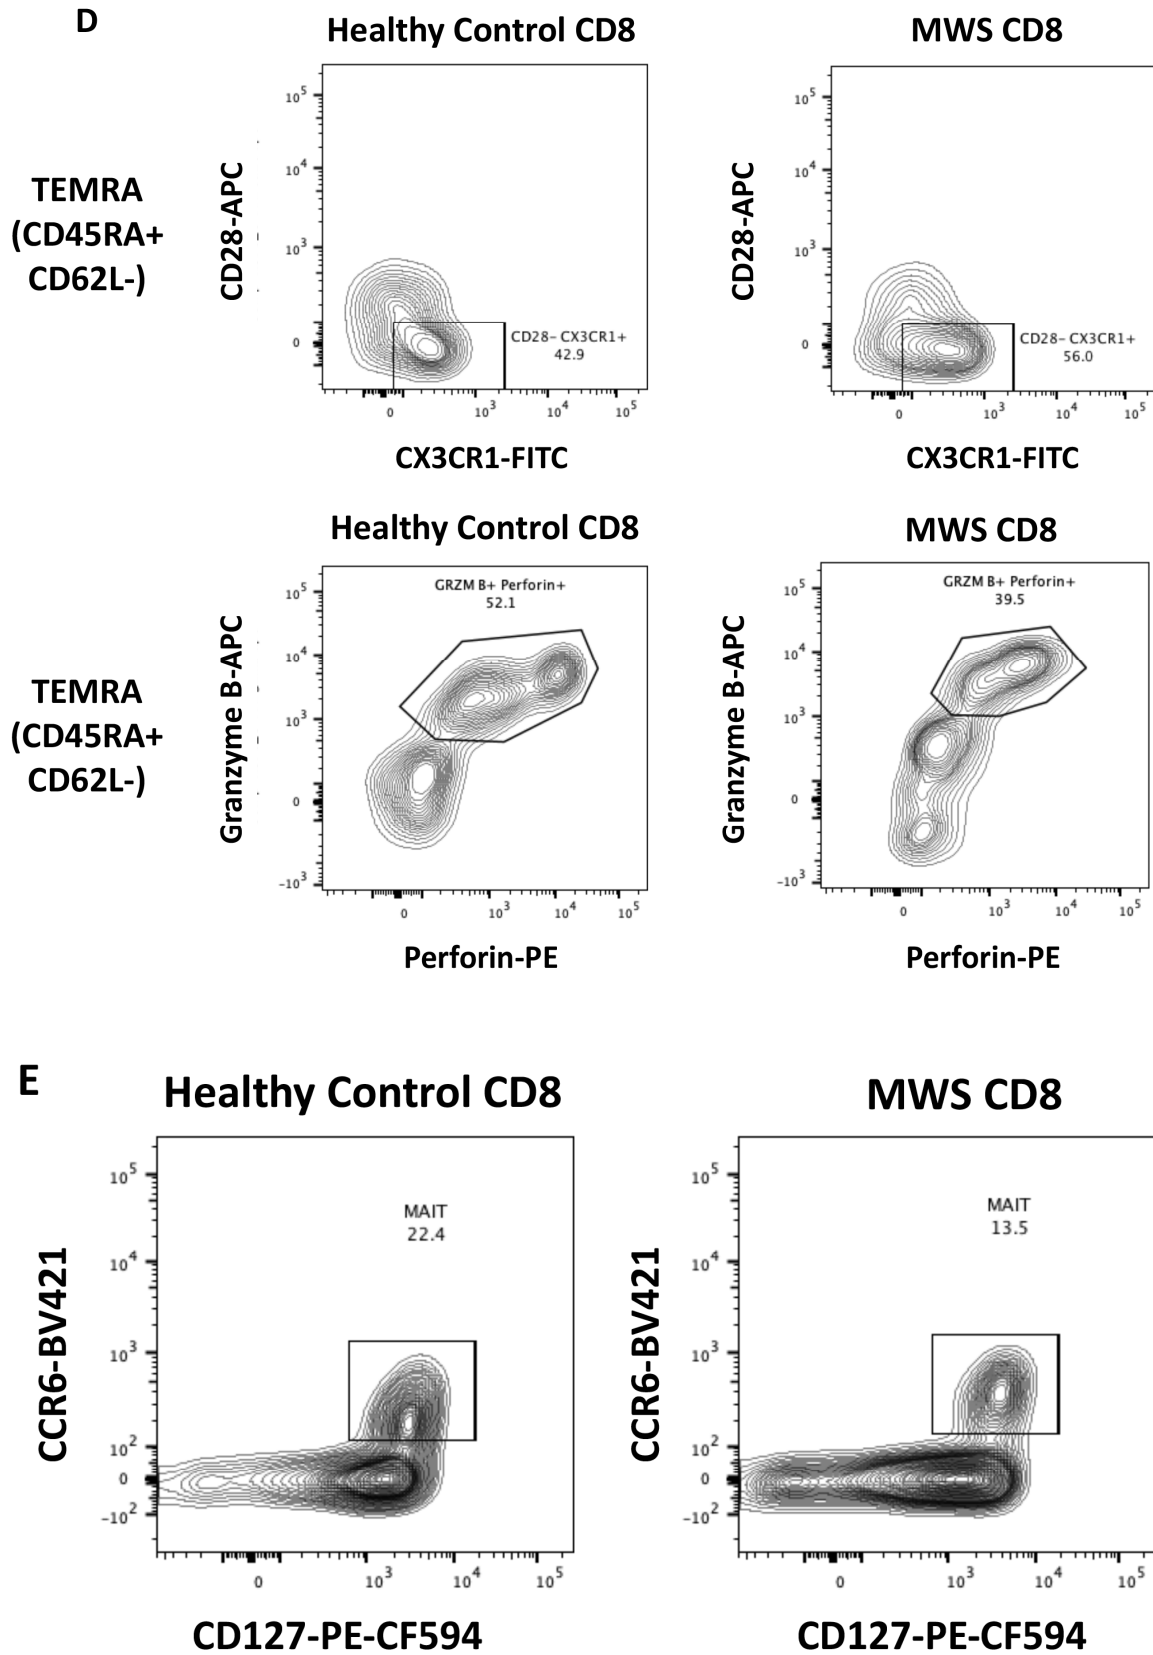

**Supplementary Figure S2:** Representative flow plots showing gating strategy for CD8 subsets in healthy controls and Mowat Wilson Syndrome (MWS) patient samples, respectively. (A) Naïve CD8 T cells (CD45RA+CD62L+), Central Memory (TCM) cells (CD45RA-CD62L+), Effector Memory (TEM) cells (CD45RA-

CD62L-) and Terminally Differentiated Memory (TEMRA) cells (CD45RA+CD62L-). (B) Upper row: Central memory CD8 T cells gut-homing memory cells (Integrin  $\beta 7$ +CD49d+), Non-gut homing memory cells (Integrin  $\beta 7$ -CD49d+) and CD49d-negative cells. Lower row: Effector memory CD8 T cells gut-homing memory cells (Integrin  $\beta 7$ +CD49d+), Non-gut homing memory cells (Integrin  $\beta 7$ -CD49d+) and CD49d-negative cells. On far right, for reference to show how gates were set, effector memory CD4 T cells with the same populations. (C) Upper row: Central memory CD8 T cells CD127+ cells. Lower row: Effector memory CD8 T cells CD127+ cells. (D) Upper row: TEMRA CD8 T cells (CD45RA+CD62L-) showing loss of CD28 and gain of CX3CR1. Lower row: TEMRA CD8 T cells (CD45RA+CD62L-) showing dual expression of Granzyme B and Perforin. (E) MAIT memory (CD45RA-) CD8 T cells gated on CCR6+CD161<sup>high</sup>CD127<sup>high</sup>.
